# Supplementary material for: New Concept for the Facile Fabrication of Core–Shell CuO@CuFe2O4 Photocathodes for PEC Application
Source: MDPI journal article supplement (doi:10.3390/ma15031029), 2022-01-28
Supplement: s1 [file s1]

# Supplementary Materials: NEW CONCEPT FOR THE FACILE FABRICATION OF CORE-SHELL $\text{CuO@CuFe}_2\text{O}_4$ PHOTOCATHODES FOR PEC APPLICATION

Linh Trinh <sup>1,\*</sup>, Krzysztof Bienkowski <sup>1</sup>, Piotr Wróbel <sup>2</sup>, Marcin Pisarek <sup>3</sup>, Aleksandra Parzuch <sup>1</sup>, Nabila Nawaz <sup>1</sup>, and Renata Solarska <sup>1,\*</sup>

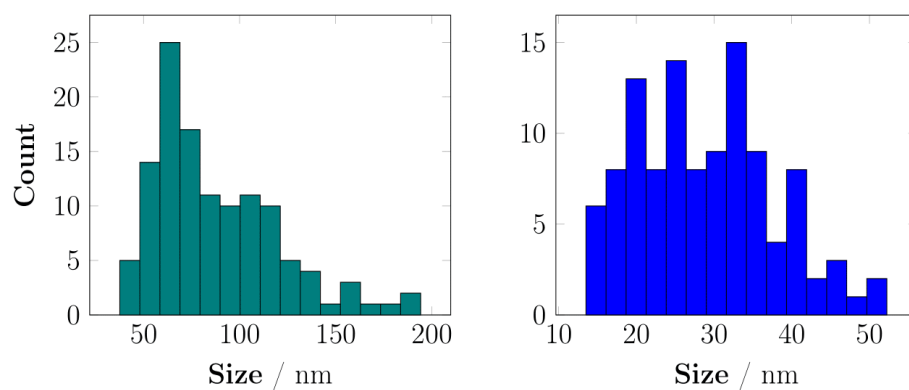

Figure S1. Size distribution of  $\text{CuFe}_2\text{O}_4$  obtained from SEM imaging

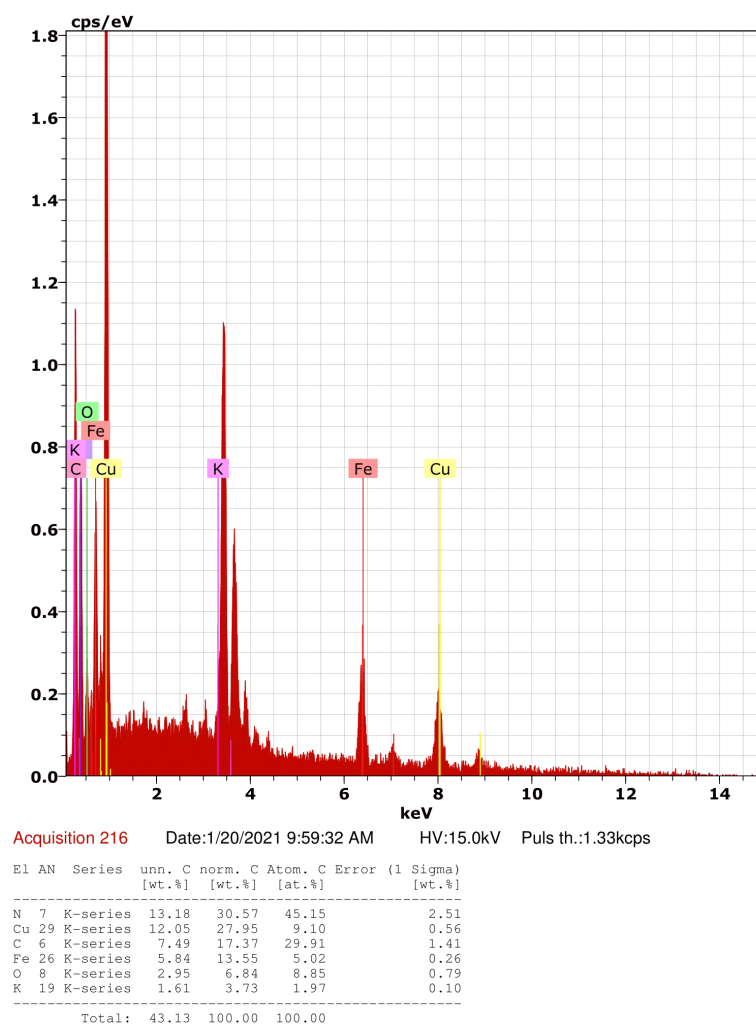

Figure S2. EDS analysis of CuFe PBAs

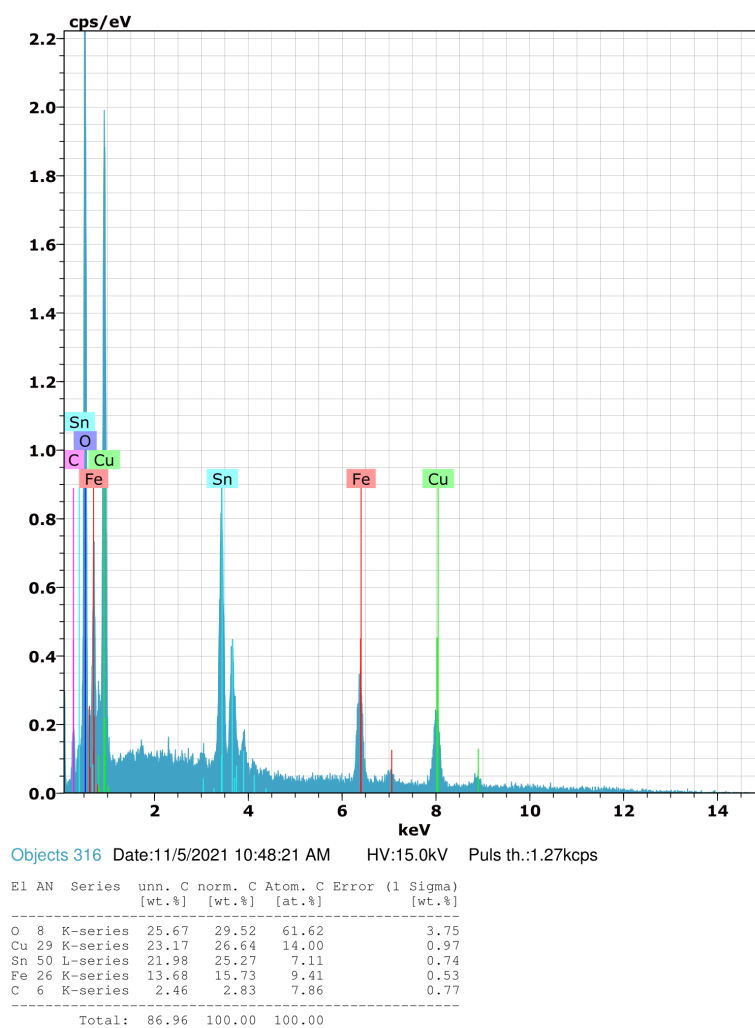Figure S3. EDS analysis of CuO@CuFe<sub>2</sub>O<sub>4</sub>

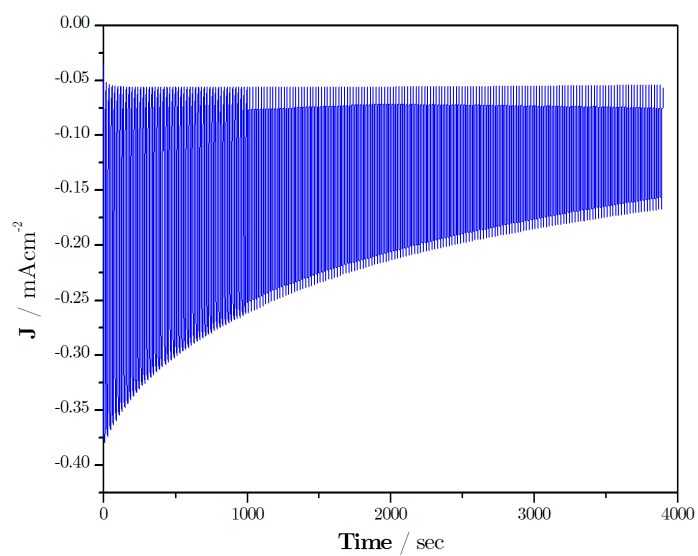

Figure S4. Extended i-T curve of CuO@CuFe<sub>2</sub>O<sub>4</sub> in NaOH 0.1 M (pH 13) under chop light irradiation

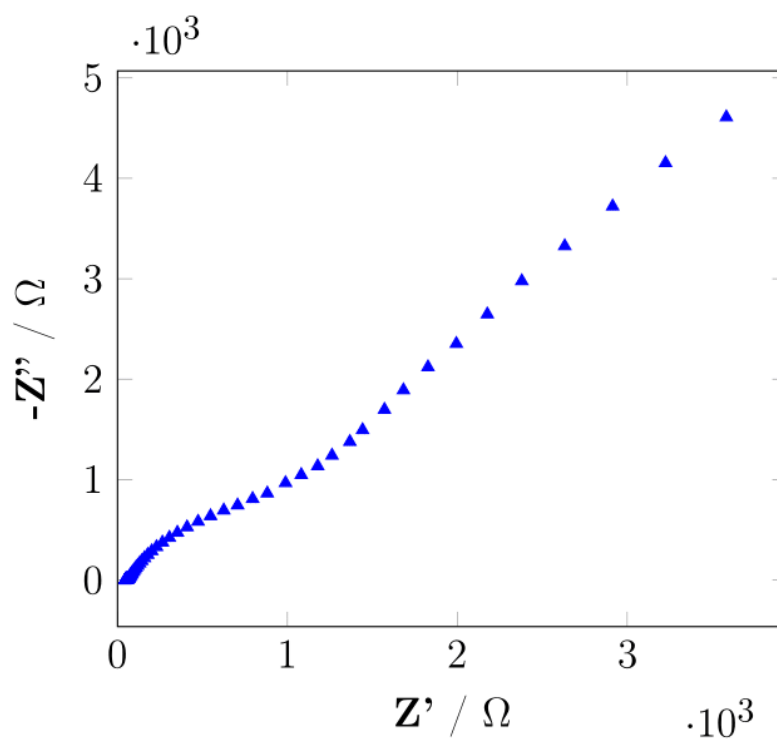

Figure S5. Nyquist measurement of CuO@CuFe<sub>2</sub>O<sub>4</sub> in NaOH 0.1 M (pH 13) under 1 sun light irradiation

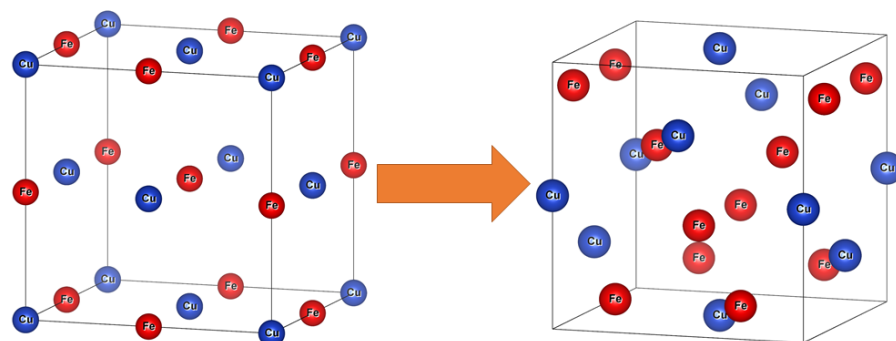

Figure S6. Crystal structure of CuFe PBAs before and after thermal conversion

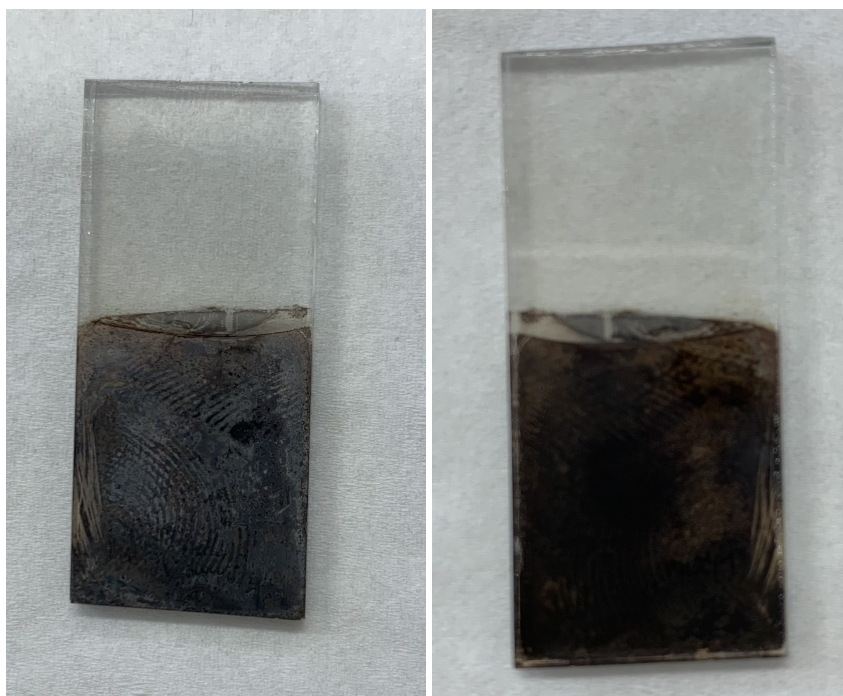

Figure S7. Images of the front and back side of prepared CuOCuFe<sub>2</sub>O<sub>4</sub> sample
